# Supplementary material
Source: PubMed Central journal article supplement (PMC6648807)
Supplement: ao8b02807_si_001.pdf [file ao8b02807_si_001.pdf]

# A simple fabrication of PVA-ZnS composite films with superior photocatalytic performance: Enhanced luminescence property, morphology and thermal stability

*Mohammad Mizanur Rahman Khan<sup>\*,†,‡</sup> Subrata Pal<sup>†</sup>, Md. Mainul Hoque,<sup>†</sup> Md.*

*Rashedul Alam,<sup>†</sup> Muhammad Younus<sup>†</sup> and Hisatoshi Kobayashi<sup>‡</sup>*

<sup>†</sup>Department of Chemistry, Shahjalal University of Science and Technology, Sylhet-3114, Bangladesh

<sup>‡</sup>International Center for Materials Nanoarchitectonics, National Institute for Materials Science (NIMS), 1-2-1, Sengen, Tsukuba, Ibaraki 305-0047, Japan

## Ⓢ Supporting Information

**KEYWORDS.** PVA–ZnS composite films, Photoluminescence property, Optical transparency, Morphology, Thermal stability, Photocatalytic activity

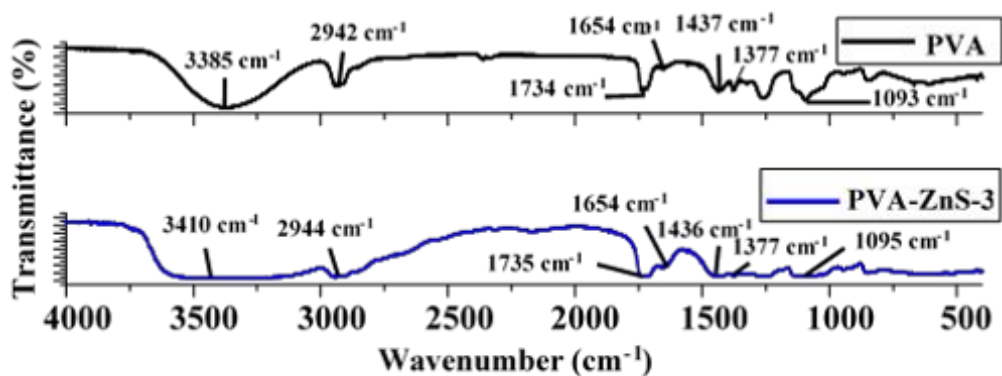

**Figure S1.** FTIR spectra of PVA and PVA–ZnS-3 composite films with detailed labelling of the peaks.

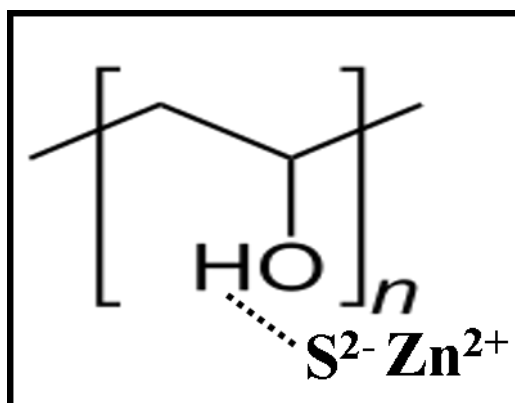

**Figure S2.** Possible hydrogen bonding between ZnS and PVA. The broken line indicates the hydrogen bond.

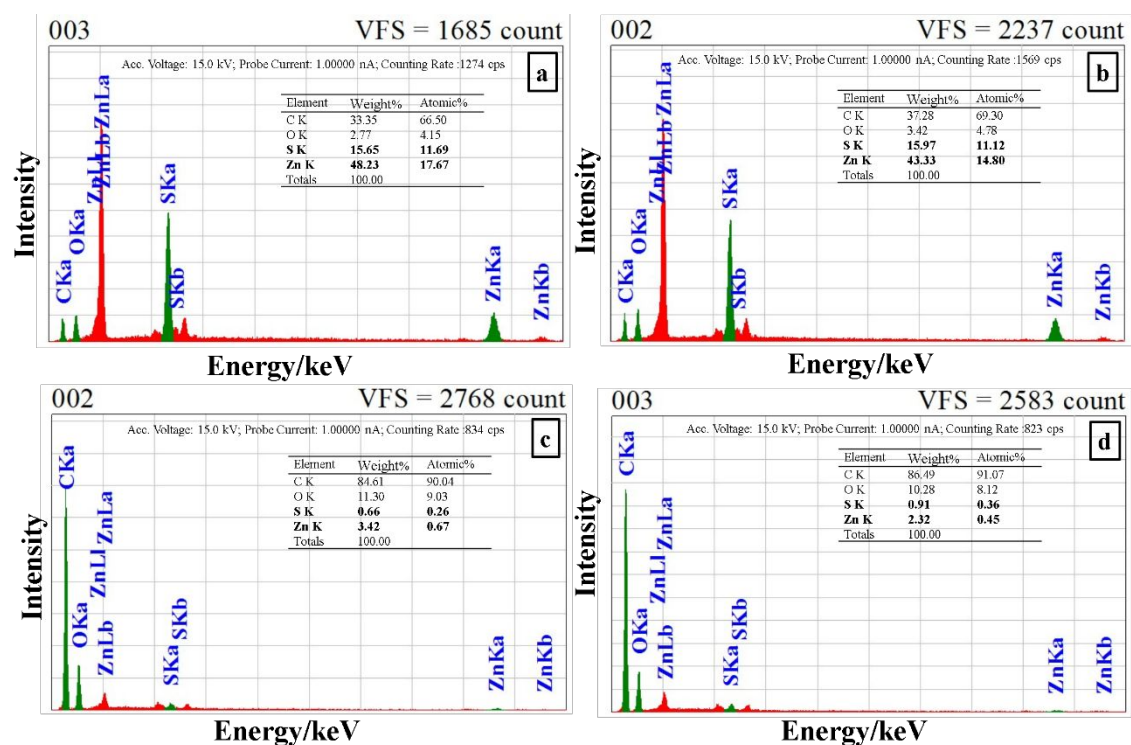

**Figure S3.** EDX spectra of a) PVA-ZnS-2, b) PVA-ZnS-3, c) PVA-ZnS-4, and d) PVA-ZnS-5 composite films.

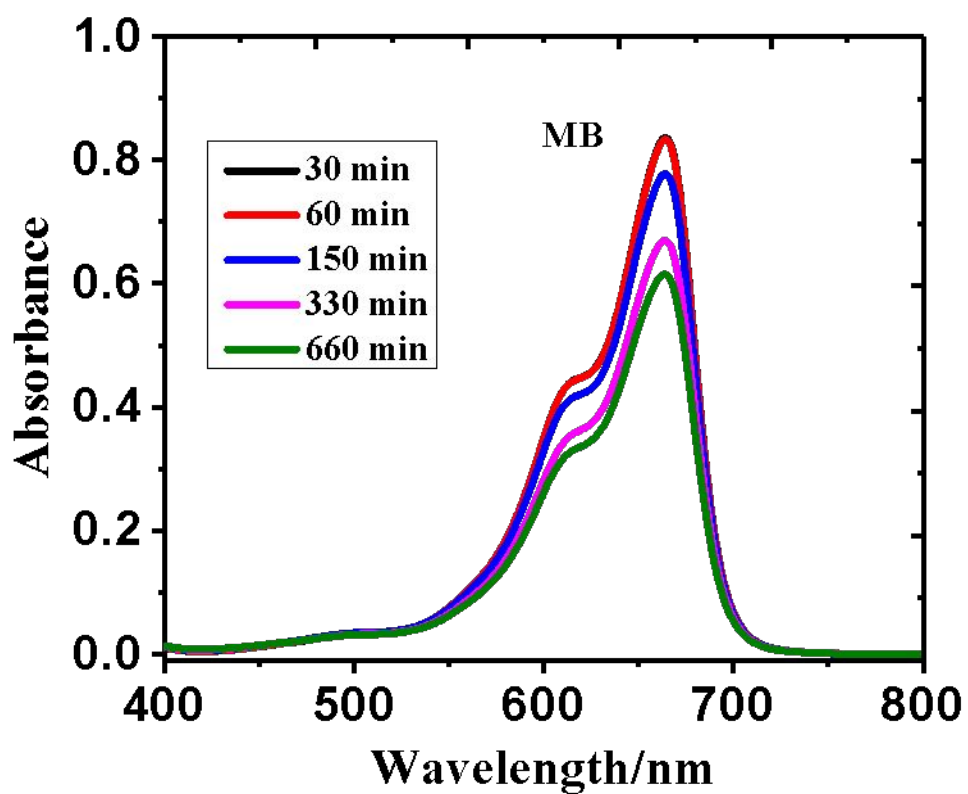

**Figure S4.** Changes in the UV-Vis absorption spectra of MB aqueous solution under sunlight irradiation.

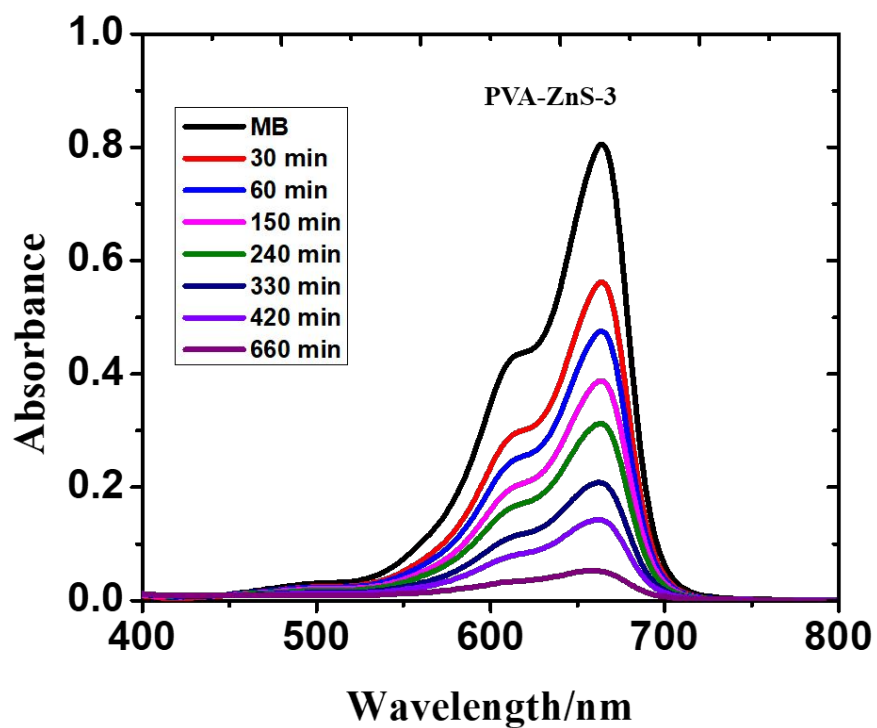

**Figure S5.** Changes in the UV-Vis absorption spectra of MB aqueous solution in the presence of PVA-ZnS composite films. The samples were reused (3 times) to check the photocatalytic performance.

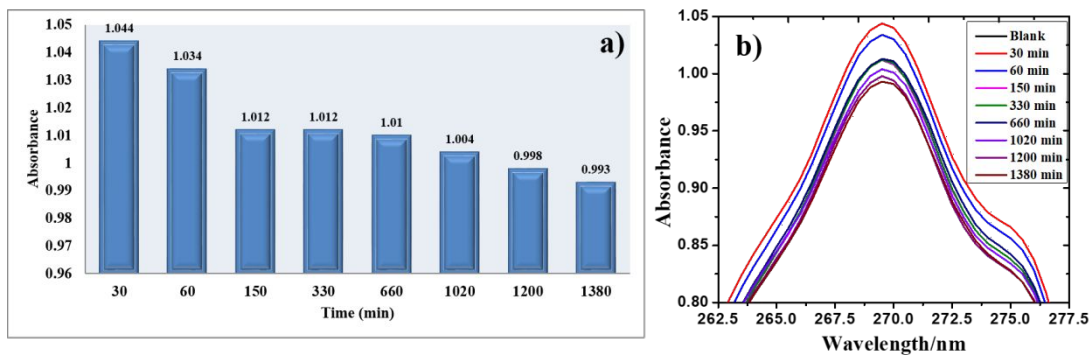

**Figure S6.** a) Plot of the absorbance versus time for the photocatalytic degradation of phenol. b) Changes in the UV-Vis absorption spectra of phenol aqueous solution in the presence of PVA-ZnS composite films.
